# Supplementary material for: Unravelling parameter interactions in calcium alginate/polyacrylamide double network hydrogels using a design of experiments approach for the optimization of mechanical properties
Source: Royal Society of Chemistry journal article supplement (doi:10.1039/d3ma00740e), 2024-01-01
Supplement: d3ma00740e1.pdf [file d3ma00740e1.pdf]

## Supporting Information for

# Unravelling parameter interactions in calcium alginate/polyacrylamide double network hydrogels using a design of experiments approach for the optimization of mechanical properties

Oliver Gorke,<sup>a</sup> Marc Stuhlmüller,<sup>a</sup> Günter E.M. Tovar,<sup>a,b</sup> Alexander Southan<sup>\*a,c</sup>

<sup>a</sup>Institute of Interfacial Process Engineering and Plasma Technology IGVP, University of Stuttgart, Nobelstr. 12, 70569 Stuttgart, Germany.

<sup>b</sup>Fraunhofer Institute for Interfacial Engineering and Biotechnology IGB, Nobelstr. 12, 70569 Stuttgart, Germany.

<sup>c</sup>Max Planck Institute for Intelligent Systems, Heisenbergstr. 3, 70569 Stuttgart, Germany.

## Table of contents

|      |                                                                        |    |
|------|------------------------------------------------------------------------|----|
| 1    | Ca-Alg/PAAm DN hydrogel preparation conditions in the literature ..... | 2  |
| 2    | Calculation of coded parameter values .....                            | 2  |
| 3    | Actual and coded parameter settings in this study .....                | 2  |
| 4    | Experimental results for all tested samples .....                      | 3  |
| 5    | Representative photo of sample for tensile tests .....                 | 5  |
| 6    | Clamping tool for tensile tests.....                                   | 5  |
| 7    | Model equation for regression of responses .....                       | 5  |
| 8    | Correlation between Young's modulus and strength.....                  | 6  |
| 9    | Correlation between Young's modulus and strain at break.....           | 6  |
| 10   | Model diagnosis graphs.....                                            | 7  |
| 10.1 | Actual values versus predicted values .....                            | 7  |
| 10.2 | Residual versus run.....                                               | 8  |
| 10.3 | Residual versus predicted values.....                                  | 9  |
| 10.4 | Normal probability plots.....                                          | 10 |
| 11   | References.....                                                        | 10 |

# 1 Ca-Alg/PAAm DN hydrogel preparation conditions in the literature

**Table S 1.** Experimental conditions used for Ca-Alg/PAAm DN hydrogel preparation in the literature. \*KPS instead of APS, \*\* $\alpha$ -ketoglutaric acid, \*\*\*relative to alginate.

| Reference | $C_{Alg}$<br>[wt.%] | $C_{AAm}$<br>[wt.%] | $C_{MBA}$<br>[wt.%]   | $C_{APS}$<br>[wt.%] | $C_{TEMED}$<br>[wt.%] | Ca cross-linker                                | Ca cross-linker concentration |
|-----------|---------------------|---------------------|-----------------------|---------------------|-----------------------|------------------------------------------------|-------------------------------|
| [1]       | 0.84 - 4.62         | 9.38 – 13.16        | 0.003<br>-<br>0.016   | ?                   | 0,023<br>-<br>0,033   | CaSO <sub>4</sub>                              | 13.28 %***                    |
| [2]       | 2                   | 12                  | 0.0036<br>-<br>0.0072 | ?                   | 0.03                  | CaSO <sub>4</sub>                              | ?                             |
| [3]       | 1.56                | 12.44               | 0.0076                | 0.012               | 0.03                  | CaCl <sub>2</sub> solution                     | 0.3 M                         |
| [4]       | 2                   | 44.56               | 0.15                  | 0.6                 | 0.178                 | CaCl <sub>2</sub> solution                     | 0.9 M                         |
| [5]       | 1 - 5               | 11.6                | 0.25                  | 0.24**              | -                     | CaCl <sub>2</sub> solution                     | 0.1 M                         |
| [6]       | 1 - 4               | 12                  | 0.05 - 0.13           | 0.046*              | -                     | CaCl <sub>2</sub> solution                     | 0.18 M                        |
| [7]       | 2.3 - 6.4           | 16.8                | 0.01                  | 0.10                | 0.092                 | CaSO <sub>4</sub> + CaCl <sub>2</sub> solution | 0.25 - 1.28 %, 1 M            |
| [8]       | 1.27 - 2.73         | 12.73<br>-<br>27.27 | 0.0005<br>-<br>0.13   | 0.038<br>-<br>0.112 | 0.015<br>-<br>0.045   | CaCO <sub>3</sub> /GDL                         | 0 - 40 wt.%***                |

## 2 Calculation of coded parameter values

Experimental values of each parameter were varied between a maximum value  $x_{max}$  and a minimum value  $x_{min}$ . The actual parameter values  $x_a$  were then transformed to the dimensionless coded parameter values  $x_c$  by using the equation:

$$x_c = \frac{2 \cdot (x_a - x_{max})}{x_{max} - x_{min}} + 1 \quad (S1)$$

Thus,  $x_{min}$  corresponds to a coded value of -1 and  $x_{max}$  to a coded value of +1.

## 3 Actual and coded parameter settings in this study

**Table S 2.** The 25 different compositions of solutions used for preparation of Ca-Alg/PAAm DN hydrogels in this study, defined by the alginate concentration  $c_{alg}$ , the fraction  $R_P$  of long-chain alginate, acrylamide concentration  $c_{AAm}$ , and MBA concentration  $c_{MBA}$ . The compositions are given in actual parameter values (left) and coded parameter values (right).

| Actual parameter values |       |                     |                     | Coded parameter values |                |           |           |
|-------------------------|-------|---------------------|---------------------|------------------------|----------------|-----------|-----------|
| $c_{alg}$<br>[wt.%]     | $R_P$ | $c_{AAm}$<br>[wt.%] | $c_{MBA}$<br>[wt.%] | $c_{alg}$              | $R_{Prot/Man}$ | $c_{AAm}$ | $c_{MBA}$ |
| 1                       | 0.17  | 6                   | 0.01                | -1                     | -1             | -1        | -1        |
| 1                       | 0.17  | 6                   | 0.03                | -1                     | -1             | -1        | 1         |
| 1                       | 0.17  | 19                  | 0.01                | -1                     | -1             | 1         | -1        |

|   |      |    |      |    |    |    |    |
|---|------|----|------|----|----|----|----|
| 1 | 0.83 | 6  | 0.01 | -1 | 1  | -1 | -1 |
| 5 | 0.17 | 6  | 0.01 | 1  | -1 | -1 | -1 |
| 1 | 0.17 | 19 | 0.03 | -1 | -1 | 1  | 1  |
| 1 | 0.83 | 19 | 0.01 | -1 | 1  | 1  | -1 |
| 5 | 0.83 | 6  | 0.01 | 1  | 1  | -1 | -1 |
| 1 | 0.83 | 6  | 0.03 | -1 | 1  | -1 | 1  |
| 5 | 0.17 | 19 | 0.01 | 1  | -1 | 1  | -1 |
| 5 | 0.17 | 6  | 0.03 | 1  | -1 | -1 | 1  |
| 1 | 0.83 | 19 | 0.03 | -1 | 1  | 1  | 1  |
| 5 | 0.17 | 19 | 0.03 | 1  | -1 | 1  | 1  |
| 5 | 0.83 | 19 | 0.01 | 1  | 1  | 1  | -1 |
| 5 | 0.83 | 6  | 0.03 | 1  | 1  | -1 | 1  |
| 5 | 0.83 | 19 | 0.03 | 1  | 1  | 1  | 1  |
| 3 | 0.5  | 12 | 0.02 | 0  | 0  | 0  | 0  |
| 1 | 0.5  | 12 | 0.02 | -1 | 0  | 0  | 0  |
| 3 | 0.17 | 12 | 0.02 | 0  | -1 | 0  | 0  |
| 3 | 0.5  | 6  | 0.02 | 0  | 0  | -1 | 0  |
| 3 | 0.5  | 12 | 0.01 | 0  | 0  | 0  | -1 |
| 5 | 0.5  | 12 | 0.02 | 1  | 0  | 0  | 0  |
| 3 | 0.83 | 12 | 0.02 | 0  | 1  | 0  | 0  |
| 3 | 0.5  | 19 | 0.02 | 0  | 0  | 1  | 0  |
| 3 | 0.5  | 12 | 0.03 | 0  | 0  | 0  | 1  |

## 4 Experimental results for all tested samples

**Table S 3.** All parameter settings and characterization data for the samples in this study. The data was collected chronologically in the order of appearance in the table. The samples with grey background were excluded from the data analysis.

| Run | $C_{alg}$<br>[wt.%] | $R_p$ | $C_{AAm}$<br>[wt.%] | $C_{MBA}$<br>[wt.%] | EDS  | $E$<br>[kPa] | $\epsilon_{max}$<br>[%] | $\sigma_{max}$<br>[kPa] | $U_T$<br>[kJ m <sup>-3</sup> ] |
|-----|---------------------|-------|---------------------|---------------------|------|--------------|-------------------------|-------------------------|--------------------------------|
| 1   | 3                   | 0.5   | 12.5                | 0.02                | 7.98 | 182.1        | 541.1                   | 313.1                   | 1148.8                         |
| 2   | 1                   | 0.17  | 19                  | 0.01                | 6.22 | 4.0          | 996.2                   | 74.6                    | 306.3                          |
| 3   | 3                   | 0.5   | 19                  | 0.02                | 7.40 | 108.4        | 586.4                   | 251.5                   | 875.8                          |
| 4   | 5                   | 0.83  | 19                  | 0.03                | 4.98 | 455.7        | 462.2                   | 844.4                   | 2494.7                         |
| 5   | 1                   | 0.83  | 19                  | 0.03                | 6.79 | 20.9         | 506.8                   | 76.2                    | 219.0                          |
| 6   | 5                   | 0.83  | 19                  | 0.03                | 5.92 | 398.1        | 407.3                   | 672.4                   | 1765.1                         |
| 7   | 5                   | 0.83  | 6                   | 0.01                | 9.23 | 816.0        | 67.1                    | 547.6                   | 200.5                          |
| 8   | 3                   | 0.83  | 12.5                | 0.02                | 5.55 | 659.6        | 83.5                    | 570.2                   | 254.4                          |
| 9   | 5                   | 0.5   | 12.5                | 0.02                | 5.74 | 381.5        | 380.1                   | 467.8                   | 1263.2                         |
| 10  | 1                   | 0.17  | 19                  | 0.01                | 4.94 | 3.4          | 928.3                   | 48.9                    | 221.7                          |
| 11  | 1                   | 0.83  | 19                  | 0.01                | 5.39 | 21.4         | 1430.9                  | 125.4                   | 988.3                          |
| 12  | 3                   | 0.5   | 12.5                | 0.03                | 4.67 | 171.8        | 475.1                   | 313.1                   | 981.1                          |
| 13  | 5                   | 0.5   | 12.5                | 0.02                | 6.84 | 447.7        | 337.2                   | 544.3                   | 1331.0                         |
| 14  | 5                   | 0.17  | 19                  | 0.03                | 6.81 | 133.9        | 398.7                   | 208.1                   | 524.5                          |
| 15  | 1                   | 0.83  | 6                   | 0.01                | 7.68 | 80.1         | 596.1                   | 101.8                   | 434.8                          |
| 16  | 3                   | 0.5   | 6                   | 0.02                | 5.99 | 340.8        | 173.5                   | 367.1                   | 602.5                          |

|    |   |      |      |      |      |       |        |       |        |
|----|---|------|------|------|------|-------|--------|-------|--------|
| 17 | 3 | 0.5  | 12.5 | 0.02 | 6.10 | 180.5 | 422.2  | 246.3 | 728.9  |
| 18 | 5 | 0.17 | 6    | 0.01 | 6.31 | 268.4 | 28.3   | 78.7  | 14.8   |
| 19 | 1 | 0.83 | 6    | 0.01 | 5.26 | 94.1  | 497.5  | 122.4 | 460.2  |
| 20 | 5 | 0.17 | 19   | 0.03 | 7.30 | 126.8 | 444.7  | 214.8 | 597.0  |
| 21 | 1 | 0.17 | 6    | 0.03 | 5.29 | 21.8  | 373.8  | 46.7  | 110.7  |
| 22 | 1 | 0.5  | 12.5 | 0.02 | 5.68 | 20.8  | 550.8  | 72.4  | 226.3  |
| 23 | 5 | 0.17 | 6    | 0.01 | 5.50 | 230.1 | 30.5   | 106.5 | 20.2   |
| 24 | 3 | 0.5  | 12.5 | 0.03 | 5.84 | 166.7 | 368.1  | 217.8 | 569.8  |
| 25 | 5 | 0.83 | 6    | 0.03 | 6.42 | 537.4 | 140.9  | 740.1 | 587.8  |
| 26 | 5 | 0.83 | 6    | 0.01 | 5.80 | 687.7 | 59.1   | 411.0 | 124.2  |
| 27 | 3 | 0.5  | 6    | 0.02 | 7.63 | 292.5 | 176.1  | 319.8 | 473.2  |
| 28 | 1 | 0.83 | 19   | 0.03 | 5.58 | 18.8  | 430.5  | 68.6  | 168.7  |
| 29 | 5 | 0.83 | 6    | 0.03 | 5.88 | 93.8  | 378.0  | 163.9 | 417.6  |
| 30 | 3 | 0.5  | 19   | 0.02 | 4.72 | 636.6 | 125.3  | 800.0 | 541.6  |
| 31 | 1 | 0.17 | 6    | 0.03 | 7.48 | 21.4  | 524.0  | 48.2  | 156.1  |
| 32 | 3 | 0.5  | 6    | 0.02 | 7.45 | 59.2  | 458.0  | 78.1  | 255.2  |
| 33 | 1 | 0.17 | 19   | 0.03 | 5.14 | 123.3 | 405.3  | 179.9 | 469.4  |
| 34 | 3 | 0.17 | 12.5 | 0.02 | 5.23 | 90.9  | 561.2  | 148.8 | 531.9  |
| 35 | 1 | 0.17 | 19   | 0.03 | 5.58 | 8.4   | 405.1  | 42.8  | 99.1   |
| 36 | 1 | 0.17 | 6    | 0.01 | 6.04 | 22.7  | 596.3  | 37.7  | 185.1  |
| 37 | 1 | 0.17 | 19   | 0.03 | 5.58 | 9.8   | 406.6  | 48.5  | 111.5  |
| 38 | 5 | 0.17 | 6    | 0.03 | 6.43 | 315.7 | 222.8  | 255.2 | 474.1  |
| 39 | 3 | 0.5  | 12.5 | 0.03 | 6.06 | 182.7 | 371.9  | 238.1 | 616.5  |
| 40 | 3 | 0.5  | 12.5 | 0.01 | 5.05 | 239.9 | 431.5  | 202.9 | 736.1  |
| 41 | 3 | 0.83 | 12.5 | 0.02 | 5.40 | 245.1 | 441.3  | 387.9 | 1241.0 |
| 42 | 5 | 0.17 | 6    | 0.01 | 4.88 | 354.3 | 36.4   | 141.4 | 29.5   |
| 43 | 1 | 0.17 | 6    | 0.01 | 5.29 | 19.5  | 598.0  | 27.9  | 121.4  |
| 44 | 3 | 0.5  | 12.5 | 0.02 | 5.18 | 184.4 | 736.4  | 346.0 | 1703.3 |
| 45 | 5 | 0.17 | 19   | 0.01 | 6.58 | 126.4 | 710.1  | 187.5 | 854.7  |
| 46 | 1 | 0.83 | 6    | 0.03 | 5.77 | 71.3  | 494.0  | 127.0 | 420.0  |
| 47 | 5 | 0.83 | 6    | 0.03 | 5.53 | 647.0 | 104.8  | 649.6 | 400.1  |
| 48 | 1 | 0.83 | 6    | 0.03 | 5.64 | 66.5  | 481.5  | 132.0 | 434.3  |
| 49 | 5 | 0.83 | 19   | 0.01 | 7.51 | 362.3 | 449.2  | 574.3 | 1932.9 |
| 50 | 5 | 0.17 | 19   | 0.01 | 5.70 | 104.8 | 815.5  | 216.5 | 1053.0 |
| 51 | 1 | 0.83 | 6    | 0.03 | 7.45 | 79.3  | 495.5  | 147.0 | 488.9  |
| 52 | 1 | 0.83 | 19   | 0.01 | 6.20 | 19.1  | 1147.8 | 208.2 | 910.3  |
| 53 | 1 | 0.83 | 19   | 0.01 | 6.29 | 16.6  | 1269.0 | 165.9 | 858.0  |
| 54 | 1 | 0.17 | 19   | 0.01 | 5.61 | 4.0   | 1106.0 | 76.4  | 360.4  |
| 55 | 1 | 0.83 | 19   | 0.03 | 5.77 | 18.2  | 439.1  | 73.5  | 181.8  |
| 56 | 5 | 0.17 | 6    | 0.03 | 6.27 | 299.2 | 208.2  | 232.9 | 427.5  |
| 57 | 5 | 0.83 | 6    | 0.01 | 7.78 | 797.0 | 86.0   | 682.5 | 311.3  |
| 58 | 1 | 0.83 | 6    | 0.01 | 6.03 | 84.0  | 901.6  | 166.6 | 984.1  |
| 59 | 3 | 0.5  | 12.5 | 0.01 | 6.23 | 219.7 | 569.6  | 288.4 | 1183.1 |
| 60 | 5 | 0.17 | 19   | 0.03 | 5.96 | 128.9 | 440.2  | 195.9 | 555.0  |
| 61 | 5 | 0.5  | 12.5 | 0.02 | 5.51 | 471.2 | 387.9  | 521.1 | 1444.0 |
| 62 | 1 | 0.5  | 12.5 | 0.02 | 5.91 | 24.1  | 264.4  | 40.6  | 77.5   |
| 63 | 3 | 0.83 | 12.5 | 0.02 | 6.55 | 266.2 | 428.6  | 380.4 | 1187.0 |
| 64 | 3 | 0.5  | 12.5 | 0.01 | 6.18 | 197.6 | 672.6  | 270.5 | 1282.3 |
| 65 | 5 | 0.17 | 19   | 0.01 | 4.91 | 145.8 | 1008.2 | 250.2 | 1527.2 |

|    |   |      |      |      |      |       |       |       |        |
|----|---|------|------|------|------|-------|-------|-------|--------|
| 66 | 1 | 0.5  | 12.5 | 0.02 | 5.85 | 23.0  | 645.5 | 69.6  | 270.6  |
| 67 | 5 | 0.83 | 19   | 0.01 | 4.96 | 425.7 | 394.2 | 548.6 | 1681.9 |
| 68 | 5 | 0.83 | 19   | 0.01 | 5.87 | 401.3 | 460.0 | 532.3 | 1816.0 |
| 69 | 5 | 0.83 | 19   | 0.03 | 6.38 | 388.7 | 441.0 | 612.4 | 1794.1 |
| 70 | 1 | 0.17 | 6    | 0.03 | 5.26 | 23.3  | 408.8 | 43.8  | 119.0  |
| 71 | 3 | 0.5  | 19   | 0.02 | 5.70 | 465.7 | 417.0 | 562.8 | 1769.7 |
| 72 | 3 | 0.17 | 12.5 | 0.02 | 5.81 | 22.5  | 653.5 | 83.5  | 302.9  |
| 73 | 5 | 0.17 | 6    | 0.03 | 5.62 | 244.9 | 487.5 | 417.4 | 1453.3 |
| 74 | 3 | 0.17 | 12.5 | 0.02 | 6.26 | 198.8 | 575.7 | 253.9 | 1207.6 |
| 75 | 1 | 0.17 | 6    | 0.01 | 6.95 | 135.9 | 726.0 | 180.4 | 909.4  |

## 5 Representative photo of sample for tensile tests

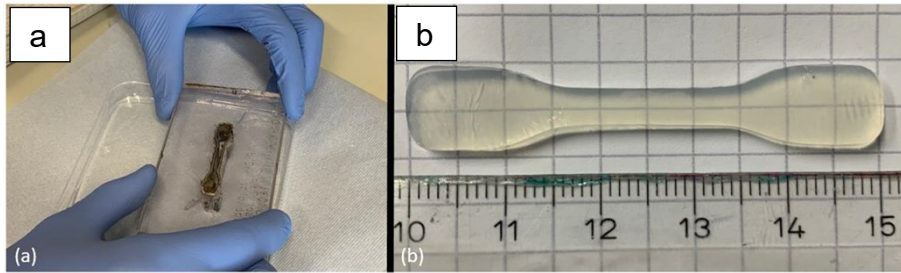

**Figure S 1.** Photography of the punching knife (a) and of an S3A tensile test specimen (b).

## 6 Clamping tool for tensile tests

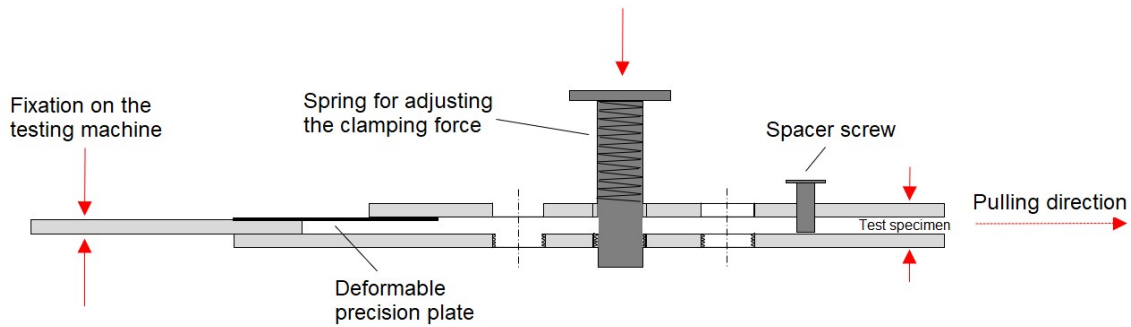

**Figure S 2.** Schematic illustration of the clamping tool used for the tensile tests.

## 7 Model equation for regression of responses

All responses  $R$  were fitted with a linear model including interaction terms:

$$\begin{aligned}
 R &= r_0 + a_{Alg} \cdot c_{Alg} + a_R \cdot R_P + a_{AAm} \cdot c_{AAm} + a_{MBA} \cdot c_{MBA} + b_{Alg,R} \cdot c_{Alg} \cdot R_P + b_{Alg,AAm} \cdot c_{Alg} \cdot c_{AAm} \\
 &\quad + b_{Alg,MBA} \cdot c_{Alg} \cdot c_{MBA} + b_{R,AAm} \cdot R_P \cdot c_{AAm} + b_{R,MBA} \cdot R_P \cdot c_{MBA} + b_{AAm,MBA} \cdot c_{AAm} \cdot c_{MBA}
 \end{aligned}
 \tag{S2}$$

### 8 Correlation between Young's modulus and strength

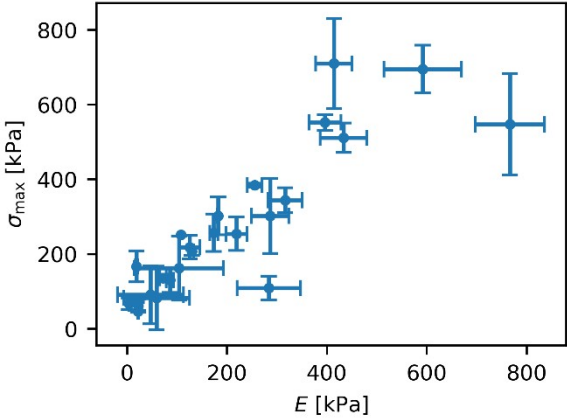

Figure S 3. Young's modulus  $E$  plotted against the strength  $\sigma_{max}$ .

### 9 Correlation between Young's modulus and strain at break

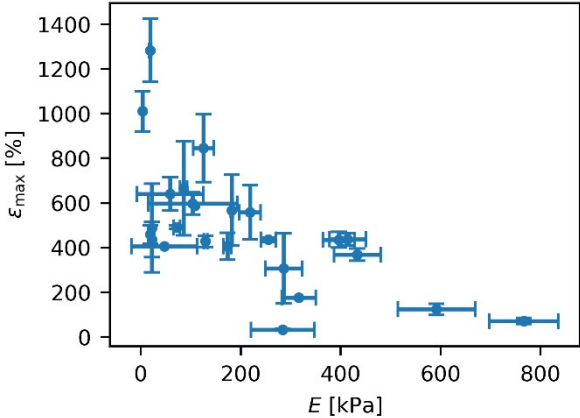

Figure S 4. The strain at break  $\epsilon_{max}$  plotted against the Young's modulus  $E$ .

## 10 Model diagnosis graphs

### 10.1 Actual values versus predicted values

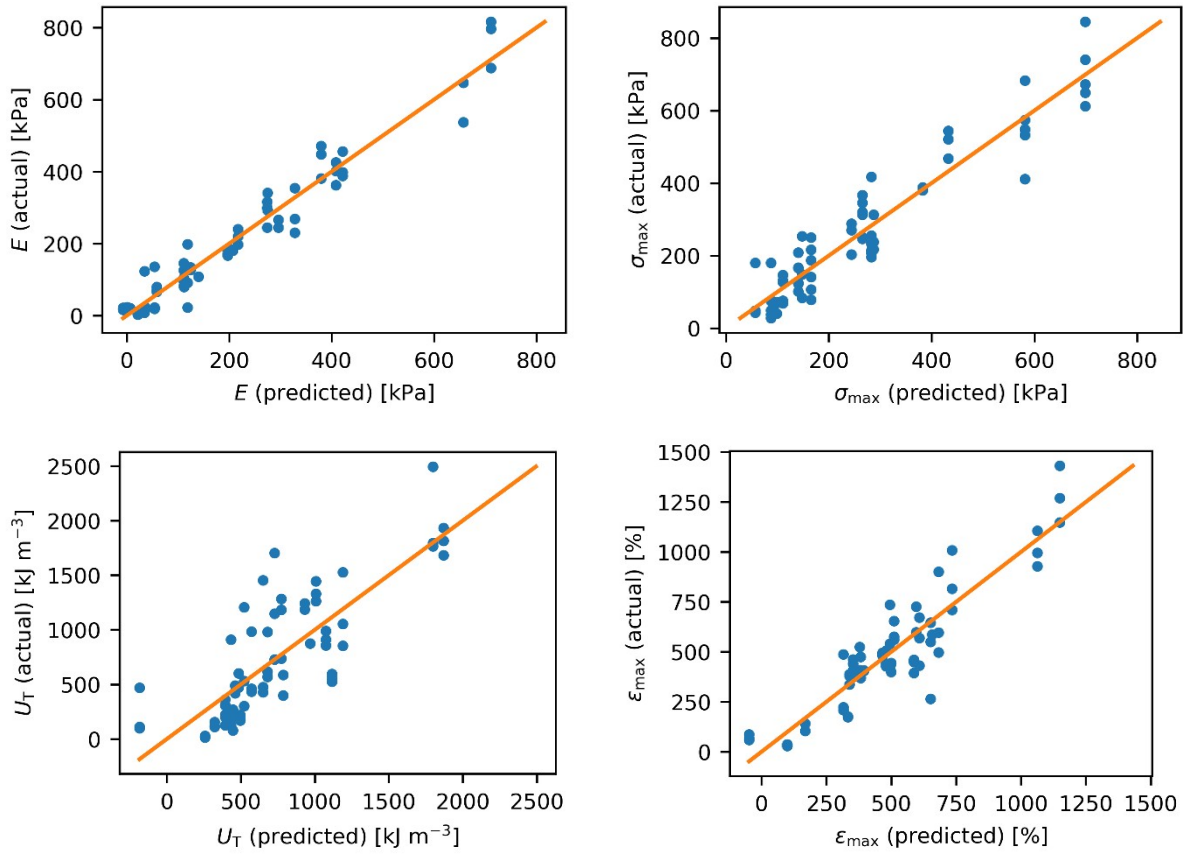

**Figure S 5.** Plots of experimental response values (actual values) against response values predicted by the regression model fitted to the data.

## 10.2 Residual versus run

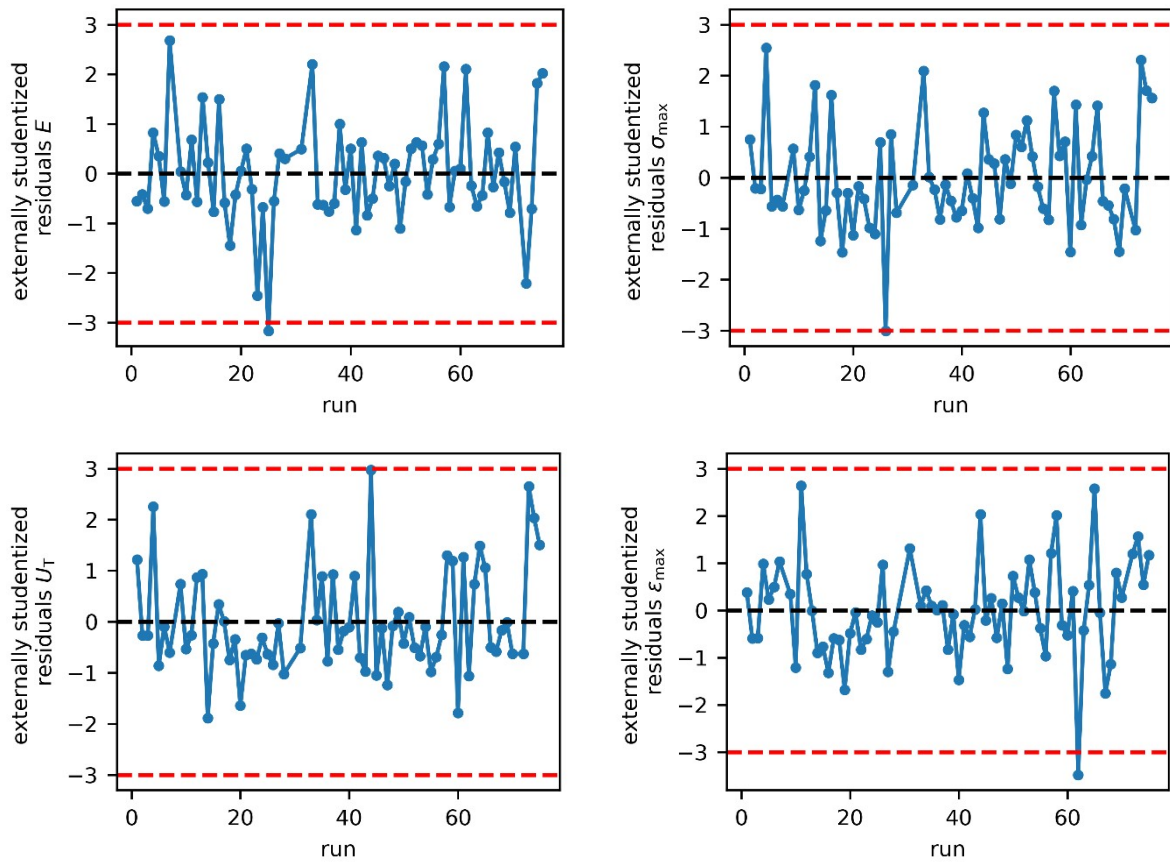

**Figure S 6.** Plots of externally studentized residuals against the run number. The run number gives the chronological order of sample preparation.



### 10.3 Residual versus predicted values

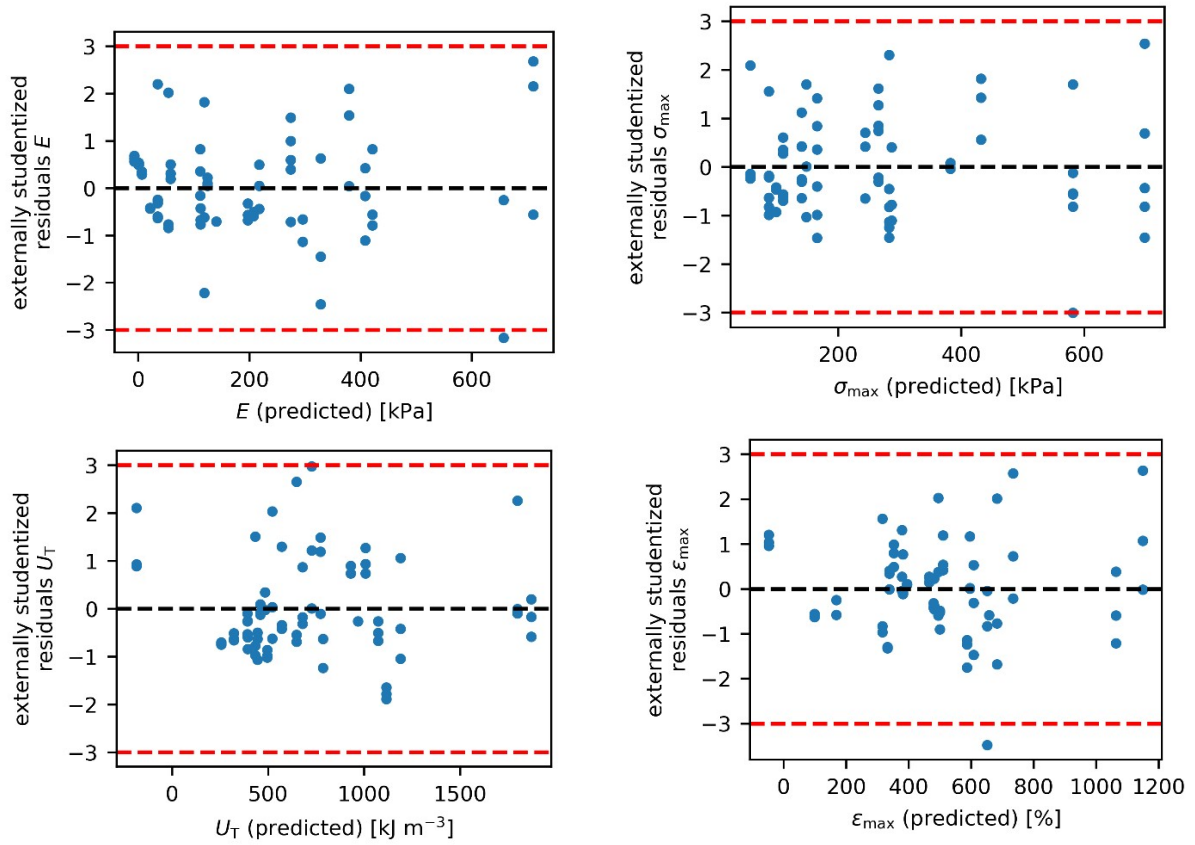

**Figure S 7.** Plots of externally studentized residuals against response values predicted by the regression model fitted to the data.

## 10.4 Normal probability plots

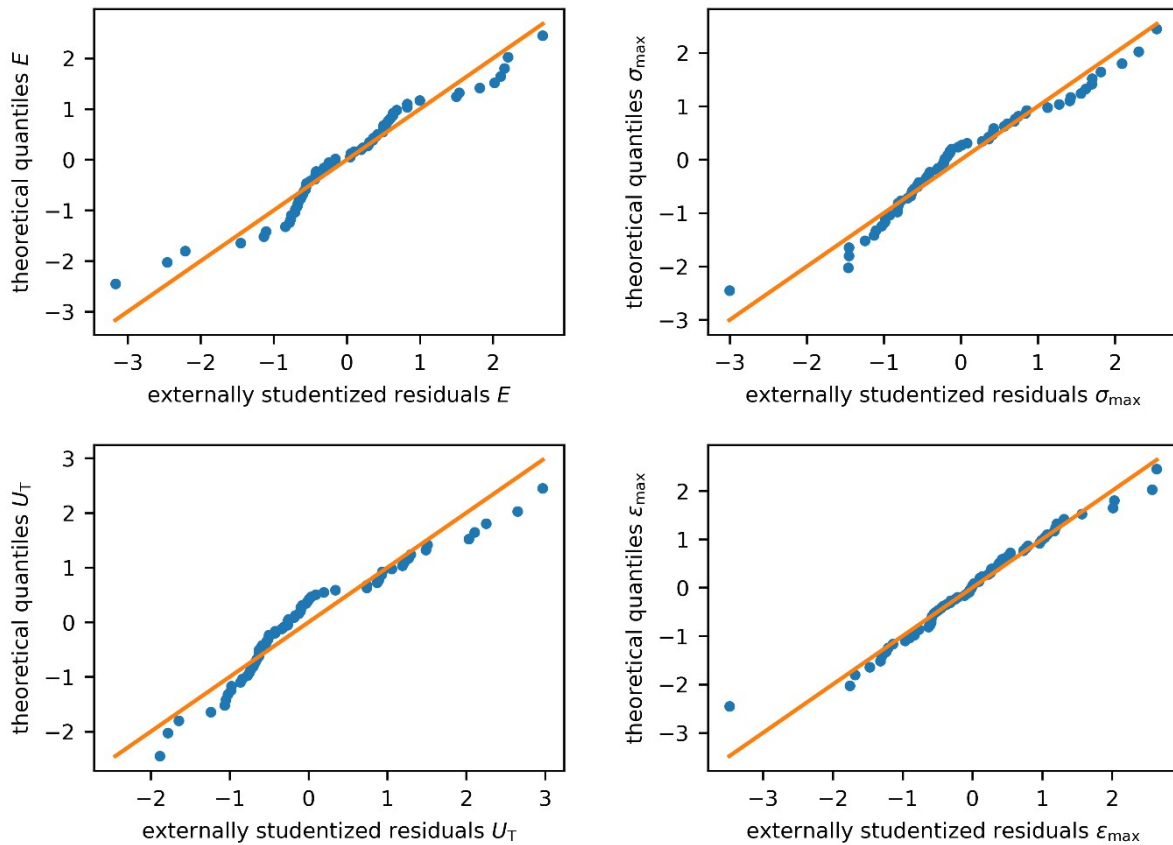

**Figure S 8.** Normal probability plots for the four responses investigated in this study.

## 11 References

- [1] J.-Y. Sun, X. Zhao, W. R. K. Illeperuma, O. Chaudhuri, K. H. Oh, D. J. Mooney, J. J. Vlassak, Z. Suo, *Nature* **2012**, *489*, 133.
- [2] M. C. Darnell, J.-Y. Sun, M. Mehta, C. Johnson, P. R. Arany, Z. Suo, D. J. Mooney, *Biomaterials* **2013**, *34*, 8042-8048.
- [3] C. H. Yang, M. X. Wang, H. Haider, J. H. Yang, J.-Y. Sun, Y. M. Chen, J. Zhou, Z. Suo, *ACS Appl. Mater. Interfaces* **2013**, *5*, 10418-10422.
- [4] I. C. Liao, F. T. Moutos, B. T. Estes, X. Zhao, F. Guilak, *Adv. Funct. Mater.* **2013**, *23*, 5833-5839.
- [5] S. E. Bakarich, M. i. h. Panhuis, S. Beirne, G. G. Wallace, G. M. Spinks, *Journal of Materials Chemistry B* **2013**, *1*, 4939-4946.
- [6] S. Naficy, S. Kawakami, S. Sadegholvaad, M. Wakisaka, G. M. Spinks, *J. Appl. Polym. Sci.* **2013**, *130*, 2504-2513.
- [7] J. Li, W. R. K. Illeperuma, Z. Suo, J. J. Vlassak, *ACS Macro Letters* **2014**, *3*, 520-523.
- [8] M. M. Fitzgerald, K. Bootsma, J. A. Berberich, J. L. Sparks, *Biomacromolecules* **2015**, *16*, 1497-1505.
